# Supplementary material
Source: Springer Nature journal article supplement (https://www.springermedizin.de/resource/supplementary/12905_2012_504_MOESM4_ESM.pdf/9518634)
Supplement: MOESM4 [file 9518634]

**Table 3 Sources of help following IPV and reasons for seeking help by victims of intimate partner violence**

| <b>Item</b>                       | <b>n (%)</b> |
|-----------------------------------|--------------|
| <b>Sources of help</b>            |              |
| Health care provider              | 81 (14.2)    |
| Religious leader                  | 72 (12.5)    |
| Family member                     | 50 (8.7)     |
| Police                            | 21 (3.7)     |
| None                              | 349 (60.9)   |
| <b>Reasons for seeking help</b>   |              |
| Encouraged by friends and family  | 54 (9.4)     |
| Could not endure violence anymore | 51 (8.9)     |
| Relationship terminated           | 10 (1.8)     |
| Injuries sustained                | 5 (0.9)      |
| No response                       | 453 (79)     |
